# Supplementary material for: Novel mechanism of cytokine-induced disruption of epithelial barriers: Janus kinase and protein kinase D-dependent downregulation of junction protein expression
Source: PubMed Central journal article supplement — Tissue Barriers. 2013 Jun 3;1(4):e25231. doi: 10.4161/tisb.25231 (PMC3783224; doi:10.4161/tisb.25231), 2013-06-03

## **Supplemental Material to:**

**Nayden G. Naydenov, Somesh Baranwal, Shadab Khan,  
Alex Feygin, Pooja Gupta and Andrei I. Ivanov**

**Novel mechanism of cytokine-induced disruption of  
epithelial barriers: Janus kinase and protein kinase  
D-dependent downregulation of junction protein  
expression**

**Tissue Barriers 2013; 1(4)**

**<http://dx.doi.org/10.4161/tisb.25231>**

**[http://www.landesbioscience.com/journals/tissuebarriers/  
article/25231/](http://www.landesbioscience.com/journals/tissuebarriers/article/25231/)**

**Supplemental Figure 1. Chemical activators of PKD induce PKD phosphorylation in model pancreatic epithelium.** HPAF-II cells were treated for indicated times with either vehicle, octylindolactam-V (OI-V) or phorbol ester (PMA) (each at 1  $\mu$ M). Activation of PKD was examined by immunoblotting using antibodies against two different phosphorylated forms of the enzyme. Representative immunoblots show that both chemicals markedly up-regulate expression of phosphorylated PKD species in pancreatic epithelial cells.

**Supplemental Figure 2. Inhibition of different PKC isoenzymes does not affect cytokine-induced disruption of the epithelial barrier and junctional disassembly.**

HPAF-II cells were treated for 48 h with IFN $\gamma$  plus TNF $\alpha$  in the presence of either vehicle or a dual inhibitor of classical and novel PKC, GF-109203X (10  $\mu$ M), a selective inhibitor of classical PKC, Gö 6983 (10  $\mu$ M) and an inhibitor of a novel PKC, rottlerin (25  $\mu$ M). The integrity of the epithelial barrier was examined by TEER measurement, while structure of AJs and TJs was determined by immunofluorescence labeling of E-cadherin and ZO-1 respectively. Neither PKC inhibitor prevents cytokine-driven disruption of the epithelial barrier and AJ/TJ disassembly. Bar, 20  $\mu$ m

**Supplemental Figure 3. Inhibition of PI3 kinase, AMPK, Src and ERK1/2 does not affect cytokine-induced disruption of the epithelial barrier and AJ disassembly.**

HPAF-II cells were treated for 48 h with IFN $\gamma$  plus TNF $\alpha$  in the presence of either vehicle or pharmacological inhibitors of PI3K (LY294002, 20  $\mu$ M), AMPK (Compound C, 100  $\mu$ M), Src kinase (PP2, 20  $\mu$ M), and ERK1/2 (U1026, 10  $\mu$ M). The integrity of the epithelial barrier was examined by TEER measurements while structure of AJs was determined by immunofluorescence labeling of E-cadherin. Neither inhibitor prevents cytokine-driven disruption of the epithelial barrier and AJ disassembly. Bar, 20  $\mu$ m

**Supplemental Figure 4. siRNA-mediated depletion of p120 catenin and E-cadherin attenuates the development of the pancreatic epithelial barrier.**

(A) Immunoblotting analysis shows that E-cadherin-specific siRNA selectively decreases expression of E-cadherin, whereas p120 catenin-specific siRNA downregulates expression of both p120-catenin and E-cadherin proteins in HPAF-II cells. (B) TEER measurements demonstrate that E-cadherin and p120 catenin-depleted HPAF-II cell monolayers have lower TEER values compared to control-siRNA-treated cells on day 4 post-transfection. Data is presented as mean  $\pm$  SE (n = 3); \*\*p < 0.001 compared to control siRNA-treated cells.





**A**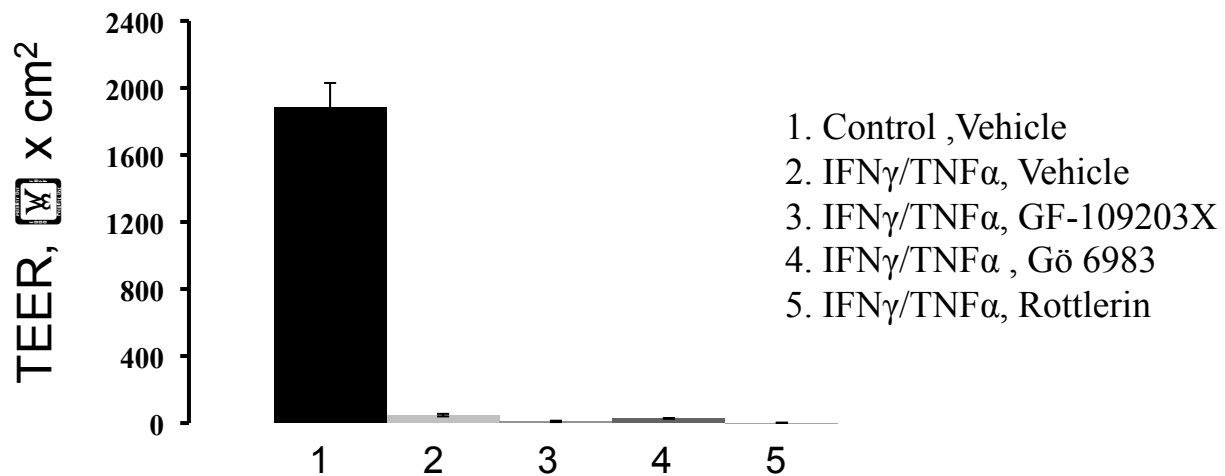**B**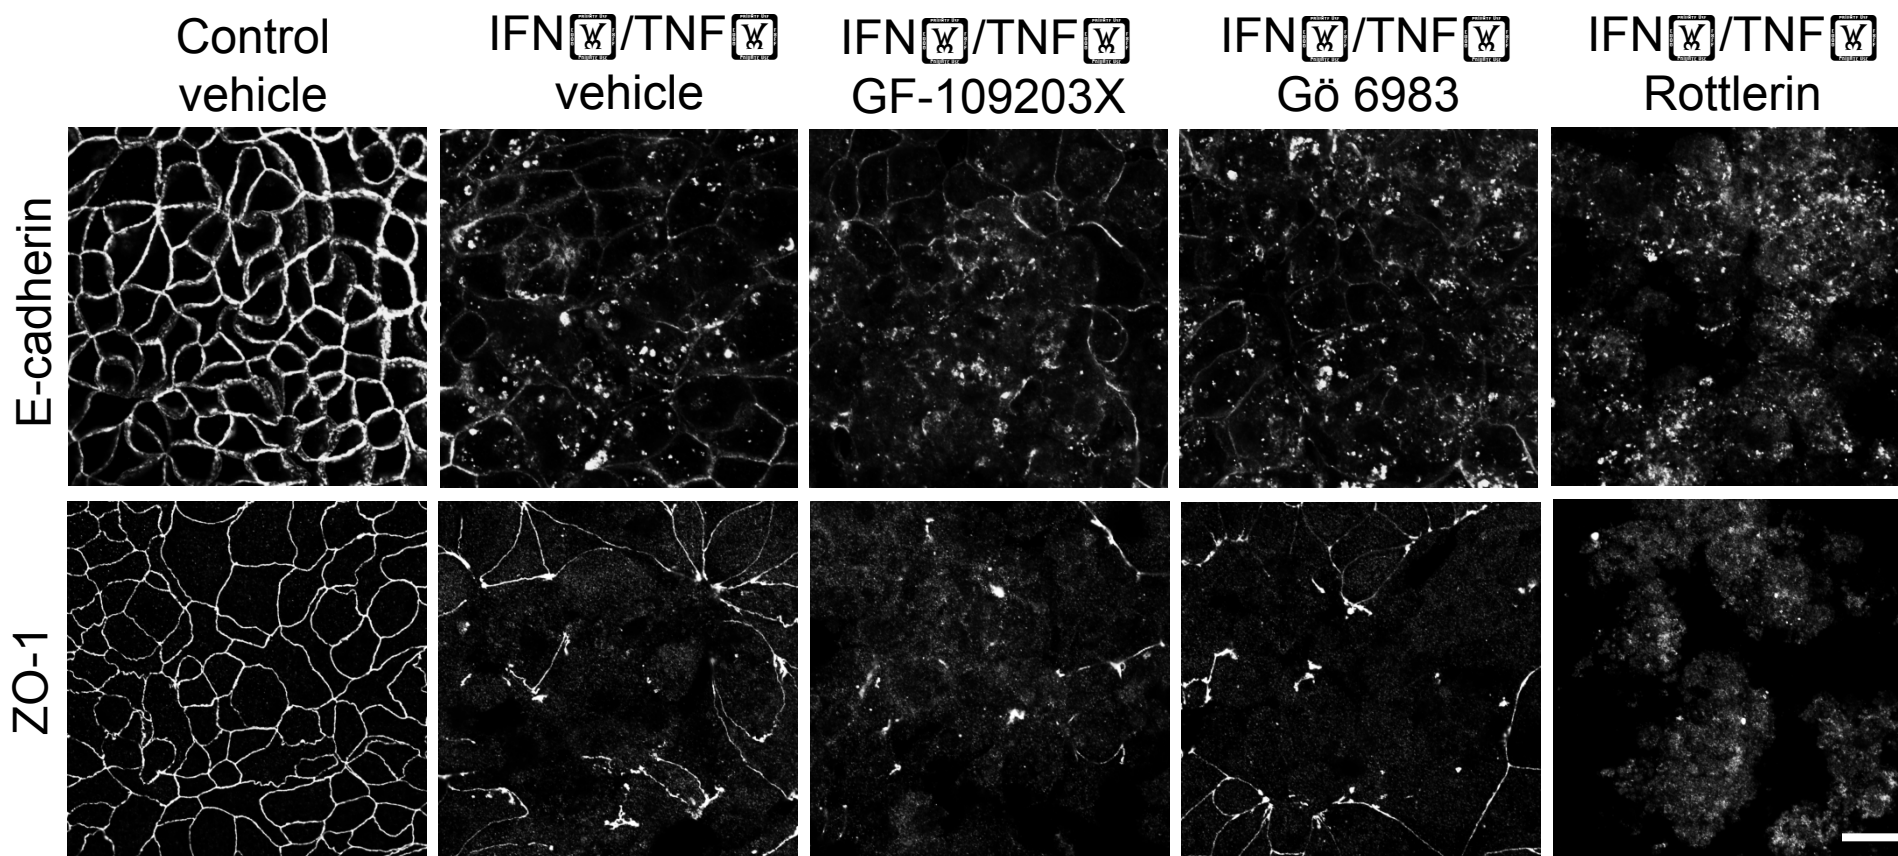

**A**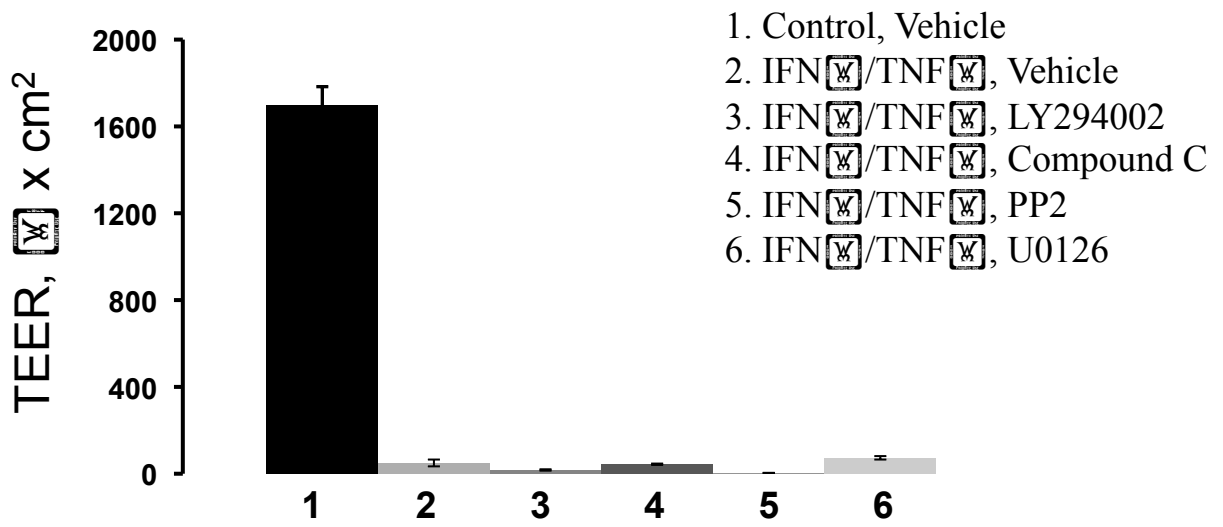**B**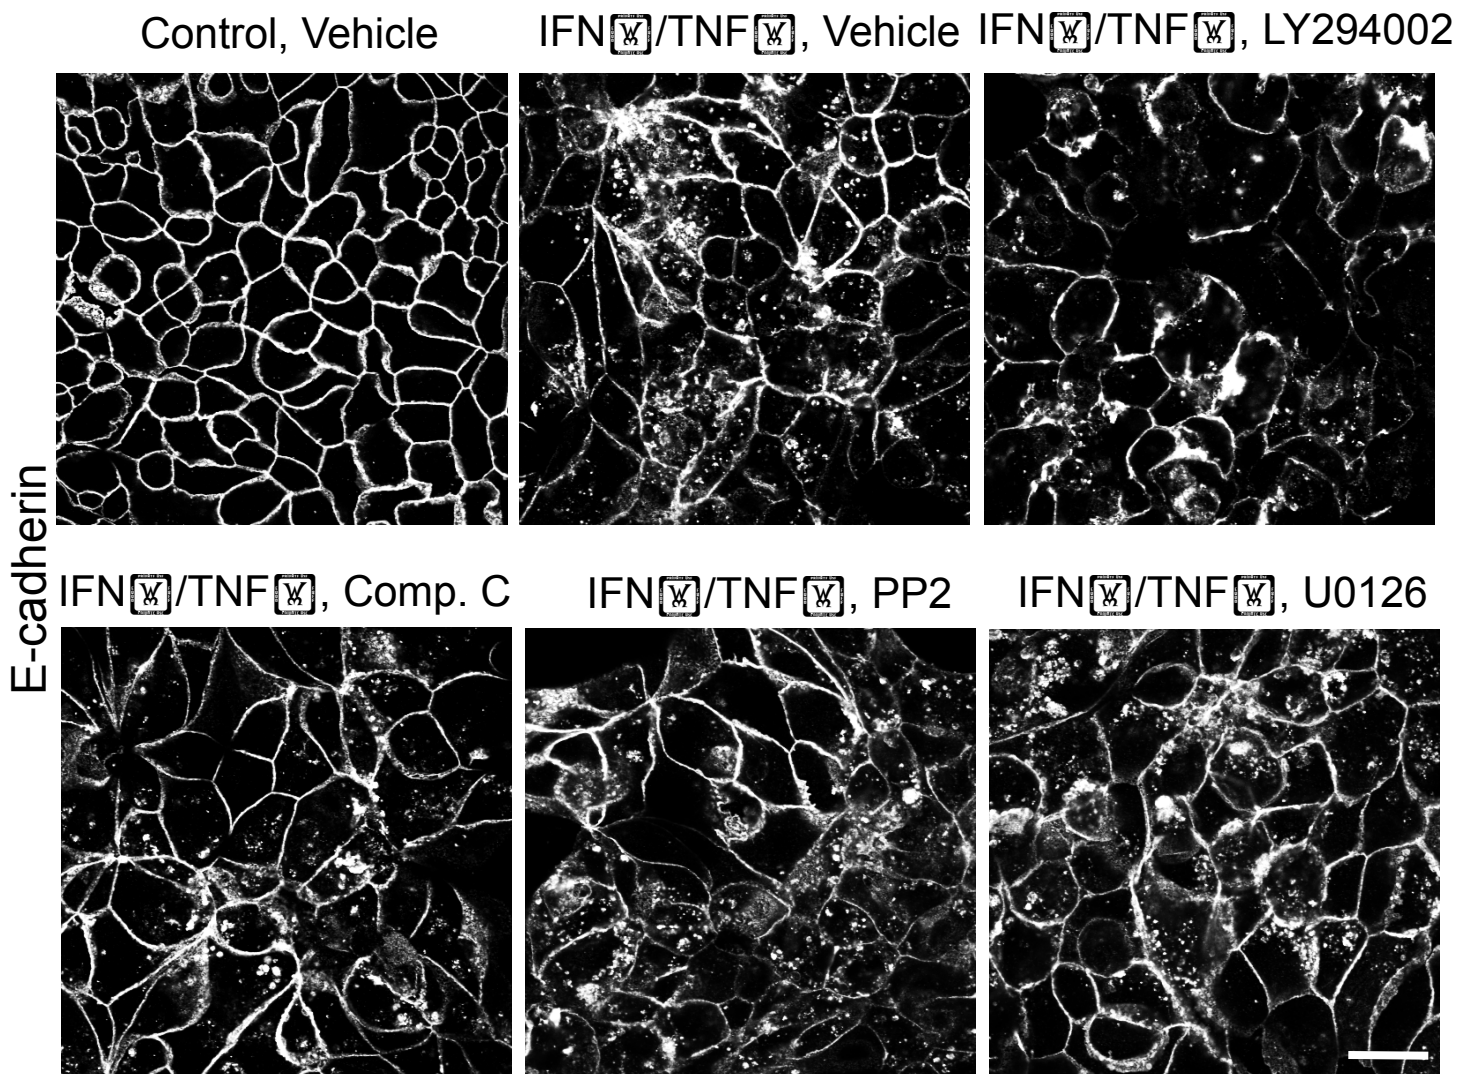

**A**

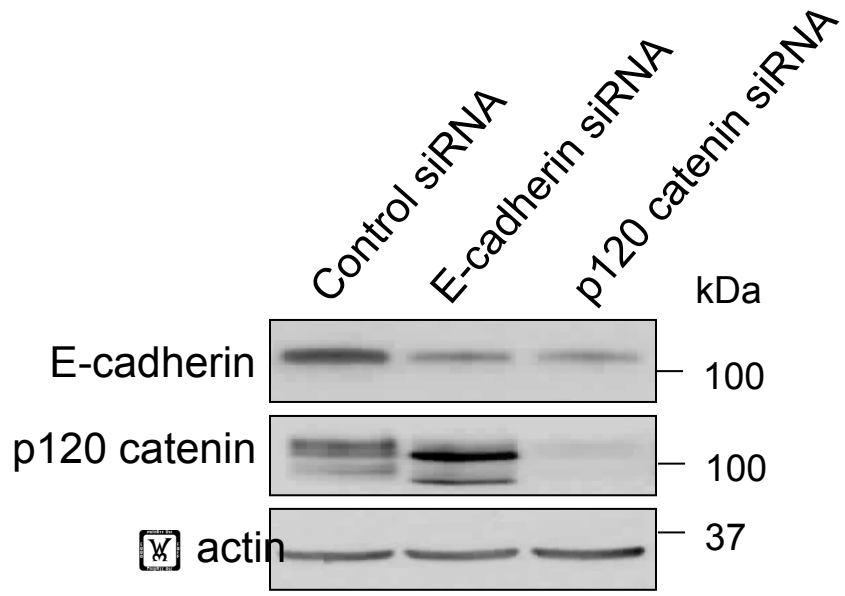

**B**

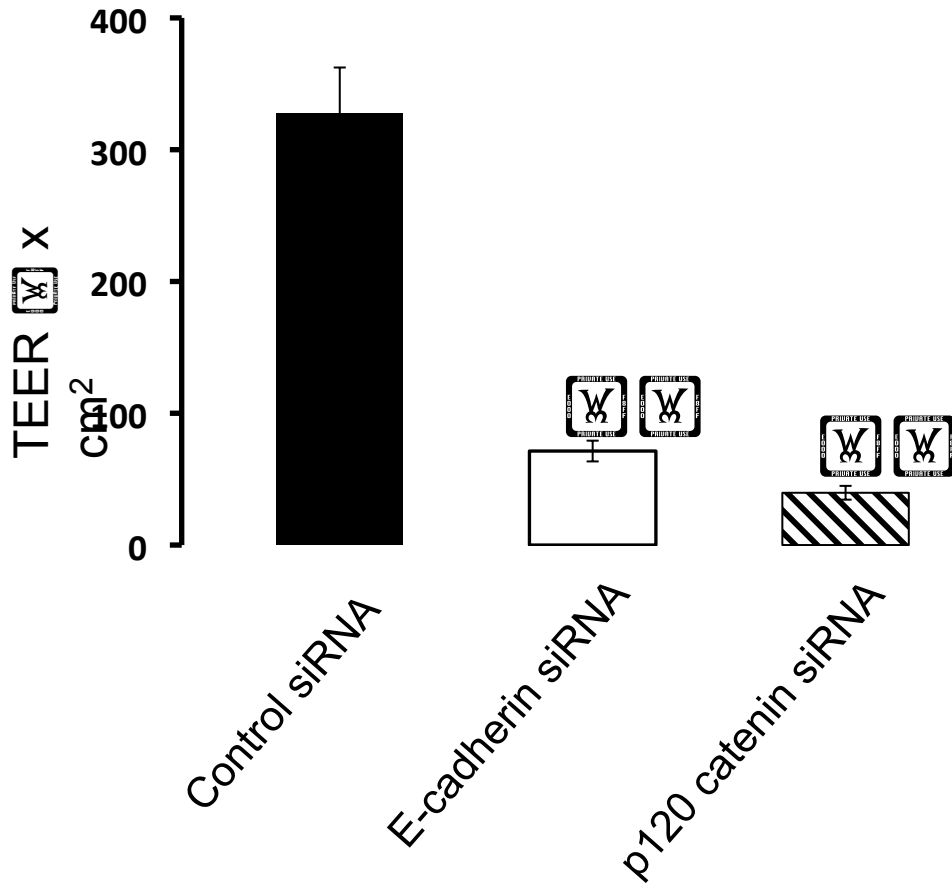

Supplement: tisb-1-e25231-s01.pdf [file tisb-1-e25231-s01.pdf]
